# Supplementary material
Source: PubMed Central journal article supplement (PMC5308800)
Supplement: NIHMS838170-supplement-Supplemental_Material.pdf [file NIHMS838170-supplement-Supplemental_Material.pdf]

**SUPPLEMENTAL MATERIAL**

**eTable 1** – Comparison of Cardiologists With and Without Missing Data

|                                                 | <b>No Missing Data<br/>(n = 3810)</b> |           | <b>Missing Data*<br/>(n = 287)</b> |          |
|-------------------------------------------------|---------------------------------------|-----------|------------------------------------|----------|
|                                                 | Count                                 | %         | Count                              | %        |
| <b>Faculty Rank</b>                             |                                       |           |                                    |          |
| Assistant                                       | 1866                                  | 49.0      | 103                                | 35.9     |
| Associate                                       | 871                                   | 22.8      | 69                                 | 24.0     |
| Full                                            | 1073                                  | 28.2      | 115                                | 40.1     |
| <b>Sub-Specialty<sup>†</sup></b>                |                                       |           |                                    |          |
| None <sup>‡</sup>                               | 2598                                  | 68.2      | 244                                | 85.0     |
| Electrophysiology                               | 497                                   | 13.0      | 20                                 | 7.00     |
| Interventional                                  | 715                                   | 18.8      | 23                                 | 8.0      |
| <b>Faculty at Top 20 Med School<sup>§</sup></b> | 1248                                  | 32.8      | 84                                 | 29.3     |
| <b>Publications</b>                             |                                       |           |                                    |          |
| Total (sd)                                      | 23.8                                  | 36.7      | 30.3                               | 40.2     |
| First/Last Author (sd)                          | 15.2                                  | 28.9      | 18.4                               | 29.2     |
| <b>NIH Grants<sup>  </sup></b>                  |                                       |           |                                    |          |
| At least one                                    | 399                                   | 10.5      | 35                                 | 12.2     |
| Median, at least one (25-75 pctile)             | 4                                     | 2-9       | 3                                  | 1-7      |
| <b>Clinical Trials<sup>  </sup></b>             |                                       |           |                                    |          |
| At least one                                    | 410                                   | 10.8      | 37                                 | 12.9     |
| Median, at least one (25-75 pctile)             | 1                                     | 1-2       | 1                                  | 1-2      |
| <b>Total Medicare Payments, 2013 (sd)</b>       | \$91,674                              | \$101,150 | \$77,154                           | \$64,773 |

Legend: Abbreviation: NIH, National Institutes of Health \*Refers to the 287 cardiologists for whom data on years since residency were unavailable. <sup>†</sup>Sub-specialty classification was based on American Board of Internal Medicine (ABIM) sub-specialty board certification. <sup>‡</sup>All cardiologists without ABIM certification in electrophysiology or interventional cardiology. <sup>§</sup>Top 20 school refers to whether a physician was on faculty at a medical school ranked among the top 20 US medical schools for research by US News & World Report in 2013.<sup>1</sup> <sup>||</sup>NIH grant information was obtained from the NIH RePORT grants database. Clinical trial information was obtained from ClinicalTrials.gov database.

**eTable 2:** Multivariable Analysis of Sex Differences in Full Professorship Among U.S. Academic Cardiologists, Presented as Absolute Adjusted Differences In Proportions

|                                                 | <b>Full Professor*</b>                  |                                              |                                            |
|-------------------------------------------------|-----------------------------------------|----------------------------------------------|--------------------------------------------|
|                                                 | <b>No./ Total (%)<br/>of Professors</b> | <b>Absolute Difference in<br/>Proportion</b> |                                            |
|                                                 |                                         | <b>Unadjusted,<br/>%</b>                     | <b>Adjusted %<br/>(95% CI)<sup>†</sup></b> |
| <b>Sex</b>                                      |                                         |                                              |                                            |
| Men                                             | 973 / 3180 (30.6)                       | [Reference]                                  |                                            |
| Women                                           | 100 / 630 (15.9)                        | -14.7                                        | -4.0 (-7.5, -0.7)                          |
| <b>Age</b>                                      |                                         |                                              |                                            |
| Age <50                                         | 51 / 1605 (3.2)                         | [Reference]                                  |                                            |
| Age 50-54                                       | 146 / 537 (27.2)                        | 24.0                                         | 14.9 (10.7, 19.1)                          |
| Age 55-59                                       | 217 / 483 (44.9)                        | 41.7                                         | 19.3 (13.7, 24.9)                          |
| Age 60-64                                       | 242 / 464 (52.2)                        | 49                                           | 15.5 (8.9, 22.1)                           |
| Age 65+                                         | 375 / 607 (61.8)                        | 58.6                                         | 9.3 (1.6, 17.1)                            |
| <b>Sub-Specialty<sup>‡</sup></b>                |                                         |                                              |                                            |
| Non-Invasive                                    | 772 / 2598 (29.7)                       | [Reference]                                  |                                            |
| Electrophysiology                               | 125 / 497 (25.2)                        | -4.5                                         | 6.1 (2.6, 9.6)                             |
| Interventional                                  | 176 / 715 (24.6)                        | -5.1                                         | 2.9 (0.02, 5.9)                            |
| <b>Years Since Residency<br/>(per 1 yr)</b>     |                                         |                                              | 1.4 (1.2, 1.7)                             |
| <b>Publication (per 1 pub)<sup>§</sup></b>      |                                         |                                              |                                            |
| Total                                           |                                         |                                              | 0.2 (0.2, 0.3)                             |
| First/Last Author                               |                                         |                                              | 0.04 (-0.02, 0.1)                          |
| <b>NIH Grant<sup>¶</sup></b>                    |                                         |                                              |                                            |
| None                                            | 827 / 3411 (61.7)                       | [Reference]                                  |                                            |
| At least one                                    | 246 / 399 (28.2)                        | -33.5                                        | 5.9 (1.7, 10.0)                            |
| <b>Clinical Trial<br/>Investigator</b>          |                                         |                                              |                                            |
| None                                            | 871 / 3400 (25.6)                       | [Reference]                                  |                                            |
| At least one                                    | 202 / 410 (49.3)                        | 36.1                                         | 7.0 (3.2, 10.7)                            |
| <b>Top 20 Med School<br/>Faculty</b>            |                                         |                                              |                                            |
| No                                              | 673 / 2440 (27.6)                       | [Reference]                                  |                                            |
| Yes                                             | 364 / 1248 (29.2)                       | 1.2                                          | -8.9 (-27.8, 9.9)                          |
| <b>2013 Medicare Payment<br/>(per \$10,000)</b> |                                         |                                              | -0.34 (-0.49, -0.19)                       |

Legend: Abbreviation: NIH, National Institutes of Health \* Factors associated with full professorship among faculty of all ranks. <sup>†</sup> Each model estimated the association between faculty rank and physician sex, adjusted for age, years since residency, Cardiology sub-specialty (e.g. non-invasive vs. electrophysiology vs. interventional cardiology), publications (total, first & last author), whether a physician was ever principal investigator on an NIH grant, whether a physician had conducted a clinical trial, whether a physician was faculty at a top 20 US medical school in terms of US News & World Report 2013 medical school research ranking, each physician's annual Medicare revenue in 2013, and medical school-level random effects.<sup>¶</sup> <sup>‡</sup> Sub-specialty classification was based on ABIM sub-specialty board certification as of November 10, 2014. <sup>§</sup> The reported association between faculty rank and publication count reflects the marginal effect of an additional publication on the probability of a given faculty rank. <sup>¶</sup> NIH grant information was obtained from the NIH RePORT grants database. Clinical trial information was obtained from ClinicalTrials.gov database.

**eTable 3:** Multivariable Analyses of Sex Differences in Secondary Outcomes Among U.S. Academic Cardiologists, Presented as Absolute Adjusted Differences In Proportions

|                                             | Associate & Full Professor (vs. Assistant)* |                                   |                      | Full Professor (vs. Associate)† |                                   |                      |
|---------------------------------------------|---------------------------------------------|-----------------------------------|----------------------|---------------------------------|-----------------------------------|----------------------|
|                                             | No./ Total (%) of Professors                | Absolute Difference in Proportion |                      | No./ Total (%) of Professors    | Absolute Difference in Proportion |                      |
|                                             |                                             | Unadjusted, %                     | Adjusted % (95% CI)‡ |                                 | Unadjusted, %                     | Adjusted % (95% CI)‡ |
| <b>Sex</b>                                  |                                             |                                   |                      |                                 |                                   |                      |
| Men                                         | 1693 / 3180 (53.2)                          | [Reference]                       |                      | 973 / 1693 (57.5)               | [Reference]                       |                      |
| Women                                       | 251 / 630 (39.8)                            | -13.4                             | 0.8 (-2.8, 4.3)      | 100 / 251 (39.8)                | -17.7                             | -7.2 (-13.5, -0.9)   |
| <b>Age</b>                                  |                                             |                                   |                      |                                 |                                   |                      |
| Age <50                                     | 348 / 1605 (21.7)                           | [Reference]                       |                      | 51 / 348 (14.7)                 | [Reference]                       |                      |
| Age 50-54                                   | 348 / 537 (64.8)                            | 43.1                              | 5.6 (1.4, 9.8)       | 146 / 348 (42.0)                | 27.3                              | 20.0 (11.9, 28.2)    |
| Age 55-59                                   | 342 / 483 (70.8)                            | 49.1                              | -1.3 (-6.3, 3.7)     | 217 / 342 (63.5)                | 48.8                              | 27.6 (17.3, 37.8)    |
| Age 60-64                                   | 341 / 464 (73.5)                            | 51.8                              | -10.1 (-15.5, -4.8)  | 242 / 341 (71.0)                | 56.3                              | 24.7 (12.2, 37.2)    |
| Age 65+                                     | 498 / 607 (82.0)                            | 60.3                              | -18.6 (-24.7, -12.5) | 375 / 498 (75.3)                | 60.6                              | 12.6 (-2.6, 27.8)    |
| <b>Sub-Specialty<sup>§</sup></b>            |                                             |                                   |                      |                                 |                                   |                      |
| Non-Invasive                                | 1323 / 2598 (50.9)                          | [Reference]                       |                      | 772 / 1323 (58.4)               | [Reference]                       |                      |
| Electrophysiology                           | 264 / 497 (53.1)                            | 2.2                               | 7.7 (4.0, 11.3)      | 125 / 264 (47.3)                | -11.1                             | 5.3 (-0.5, 11.0)     |
| Interventional                              | 357 / 715 (49.9)                            | -1.0                              | 2.6 (-0.6, 5.8)      | 176 / 357 (49.3)                | -9.1                              | 4.7 (0.6, 10.0)      |
| <b>Years Since Residency (per 1 yr)</b>     |                                             |                                   | 2.6 (2.3, 2.9)       |                                 |                                   | 2.2 (1.7, 2.7)       |
| <b>Publication (per 1 pub)<sup>  </sup></b> |                                             |                                   |                      |                                 |                                   |                      |
| Total                                       |                                             |                                   | 0.5 (0.4, 0.6)       |                                 |                                   | 0.3 (0.2, 0.4)       |
| First/Last Author                           |                                             |                                   | 0.1 (-0.02, 0.1)     |                                 |                                   | 0.1 (-0.1, 0.2)      |
| <b>NIH Grant<sup>#</sup></b>                |                                             |                                   |                      |                                 |                                   |                      |
| None                                        | 1611 / 3411 (47.2)                          | [Reference]                       |                      | 827 / 1611 (51.3)               | [Reference]                       |                      |
| At least one                                | 333 / 399 (83.5)                            | 36.3                              | 1.0 (-4.5, 6.4)      | 246 / 333 (73.9)                | 22.6                              | 8.2 (1.9, 14.5)      |
| <b>Clinical Trial Investigator</b>          |                                             |                                   |                      |                                 |                                   |                      |
| None                                        | 1621 / 3400 (47.7)                          | [Reference]                       |                      | 871 / 1621 (53.7)               | [Reference]                       |                      |
| At least one                                | 323 / 410 (78.8)                            | 31.1                              | 11.4 (6.8, 16.0)     | 202 / 323 (62.5)                | 8.8                               | 7.4 (1.6, 13.1)      |
| <b>Top 20 Med School Faculty</b>            |                                             |                                   |                      |                                 |                                   |                      |
| No                                          | 1236 / 2440 (50.7)                          | [Reference]                       |                      | 673 / 1236 (54.4)               | [Reference]                       |                      |
| Yes                                         | 658 / 1248 (52.7)                           | 2.0                               | 4.0 (-18.8, 26.8)    | 364 / 658 (55.3)                | 0.9                               | -15.1 (-45.6, 15.4)  |
| <b>2013 Medicare Payment (per \$10,000)</b> |                                             |                                   | -0.26 (-0.39, -0.12) |                                 |                                   | -0.36 (-0.63, -0.09) |

Legend: Abbreviation: NIH, National Institutes of Health \* Factors associated with associate or full professorship among faculty of all ranks. † Factors associated with full professorship among faculty at the associate or full professor rank. ‡ Each model estimated the association between faculty rank and physician sex, adjusted for age, years since residency, cardiology sub-specialty (e.g. non-invasive vs. electrophysiology vs. interventional cardiology), publications (total, first and last author), whether a physician was ever principal investigator on an NIH grant, whether a physician had conducted a clinical trial, whether a physician was faculty at a top 20 US medical school in terms of US News & World Report 2013 medical school research ranking,<sup>1</sup> each physician's annual Medicare revenue in 2013, and medical school-level random effects. §Sub-specialty classification was based on ABIM sub-specialty board certification. <sup>1</sup> The reported association between faculty rank and publication count reflects the marginal effect of an additional publication on the probability of a given faculty rank. # NIH grant information was obtained from the NIH RePORT grants database. Clinical trial information was obtained from ClinicalTrials.gov database.



**Appendix A:** Description of Sensitivity Analysis Assessing Different Methods for Defining Sub-Specialty Practice

Because ABIM subspecialty board examinations in interventional cardiology and electrophysiology were implemented relatively recently—in 1999 and 1992, respectively—and are not mandatory prerequisites for practicing these subspecialties (though they are strongly encouraged), some practicing interventional cardiologists and electrophysiologists are not board certified.<sup>2,3</sup> We therefore assessed whether incorporating procedural billing data into our definitions of these specialists affected our findings. To do so, we estimated our multivariate regression analysis three times, each time using a different one of the following methods for identifying interventional cardiologists and electrophysiologists: 1) Active ABIM board certification in interventional cardiology or electrophysiology as of November, 2014 (method used in original analysis); 2) Evidence that a physician billed Medicare for at least one interventional cardiology or electrophysiology procedures in 2013 (See **Appendix B** below for list of CPT Codes corresponding to these procedures); and 3) Fulfilling definitions in 1) and/or 2) above.

**Appendix B:** Medicare CPT Codes for Interventional Cardiology and Electrophysiology Procedures

|                                      | Procedures                                     | CPT Codes                                                                                                                      |
|--------------------------------------|------------------------------------------------|--------------------------------------------------------------------------------------------------------------------------------|
| Interventional cardiology Procedures | Peripheral angioplasty and stenting procedures | 75962-26, 75966-26, 75978-26, 35471, 35475, 35476, 37215, 37216, 37221, 37223, 37226, 37230, 37234, 37236, 37237, 37238, 37239 |
|                                      | Carotid artery stenting                        | 37215, 37216, 37218                                                                                                            |
|                                      | Percutaneous coronary interventions            | 92920<br>92921<br>92924<br>92925<br>92928<br>92929<br>92933<br>92934<br>92937<br>92938<br>92941<br>92943<br>92944              |
|                                      | Pacemaker/ICD/CRT Insertion                    | 33206<br>33207<br>33208<br>33249<br>33225                                                                                      |
| Electrophysiology Procedures         | EP Studies                                     | 93600<br>93602<br>93609<br>93610<br>93620<br>93621<br>93620-26<br>93650<br>93653                                               |



**REFERENCES:**

1. U.S. News & World Report. Best Medical Schools: Research [Internet]. [cited 2014 Sep 9]; Available from: <http://grad-schools.usnews.rankingsandreviews.com/best-graduate-schools/top-medical-schools>.
2. Fiorilli PN, Minges KE, Herrin J, Messenger JC, Ting HH, Nallamothu BK, Lipner RS, Hess BJ, Holmboe ES, Brennan JJ, Curtis JP. Association of Physician Certification in Interventional Cardiology with In-Hospital Outcomes of Percutaneous Coronary Intervention. *Circulation*. 2015;132:1816-24.
3. Zipes DP, Downing SM, Kangilaski R, Norcini JJ. The First Cardiac Electrophysiology Examination for Added Qualifications. *J Cardiovasc Electrophysiol*. 1994;5:641-644.
